# Supplementary material for: Elevated circulating amyloid concentrations in obesity and diabetes promote vascular dysfunction
Source: JCI journal article supplement (doi:10.1172/jci122237), 2020-05-14
Supplement: sd1 [file 1]

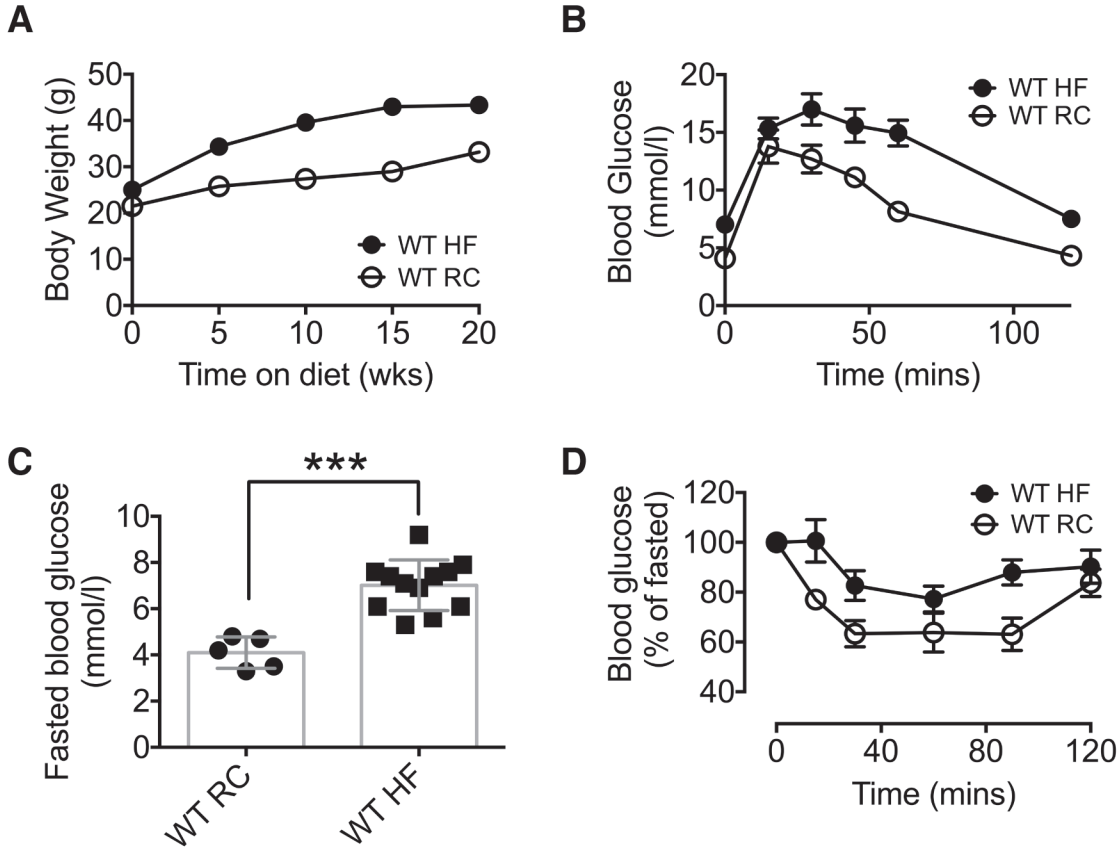

**Supplemental Figure 1. High fat fed WT mice exhibit increased body weight, impaired glucose disposal, higher fasted glucose and reduced insulin sensitivity.**

(A) Body weight curves of age-matched (8-10 weeks old) WT littermate mice following 20 weeks of regular chow (RC:  $n=11$ ) or high fat (HF:  $n=15$ ) diet. (B) Intraperitoneal glucose tolerance on RC-fed ( $n=5$ ) and HF-fed ( $n=12$ ) WT mice performed on week 19 of dietary intervention. (C) Fasted blood glucose levels of WT mice on RC or HF diet for 19 weeks. (D) Intraperitoneal insulin tolerance on RC-fed ( $n=8$ ) and HF-fed ( $n=6$ ) WT mice performed on week 20 of dietary intervention. Data are means  $\pm$  SEM. \*\*\* $P < 0.001$  by 2-tailed unpaired Student's t-test.

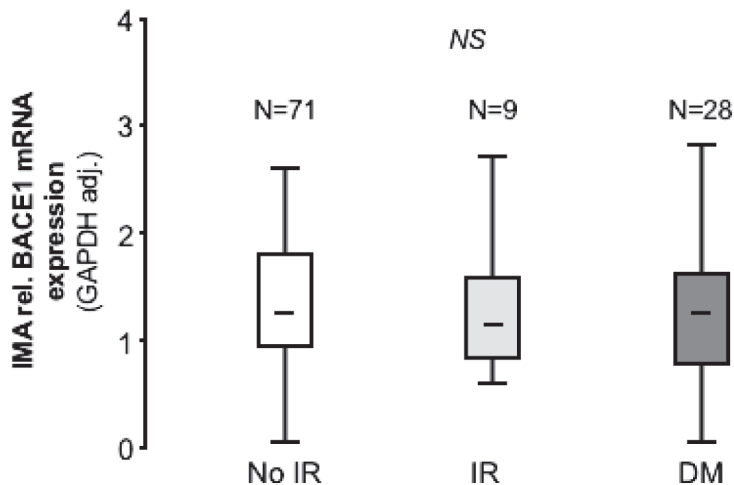

**Supplemental Figure 2. Internal mammary artery BACE1 mRNA expression as a function of diabetes and insulin resistance.**

IR: insulin resistance (defined by HOMA-IR > 2.8). DM: diabetes mellitus.

NS: non-significant. Data presented as means  $\pm$  SD.

**A**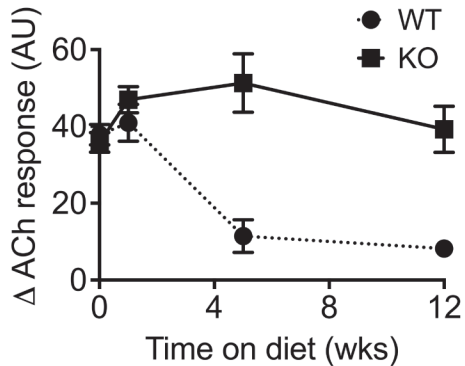**B**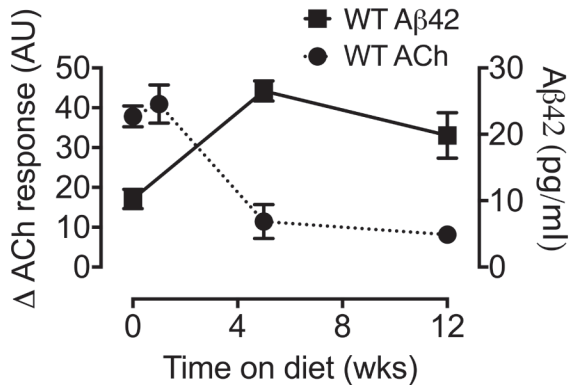

**Supplemental Figure 3. ACh response size and plasma A $\beta_{42}$  with time on HF diet.**

(A) Endothelium-dependent microvascular responses induced by ACh in HF-fed WT and *BACE1*<sup>KO</sup> mice as a function of time on diet ( $n=6-18$ ). (B) Endothelium-dependent microvascular responses induced by ACh with corresponding plasma A $\beta_{42}$  levels in HF-fed untreated WT mice as a function of time on diet ( $n=9-19$ ). Data are means  $\pm$  SEM.

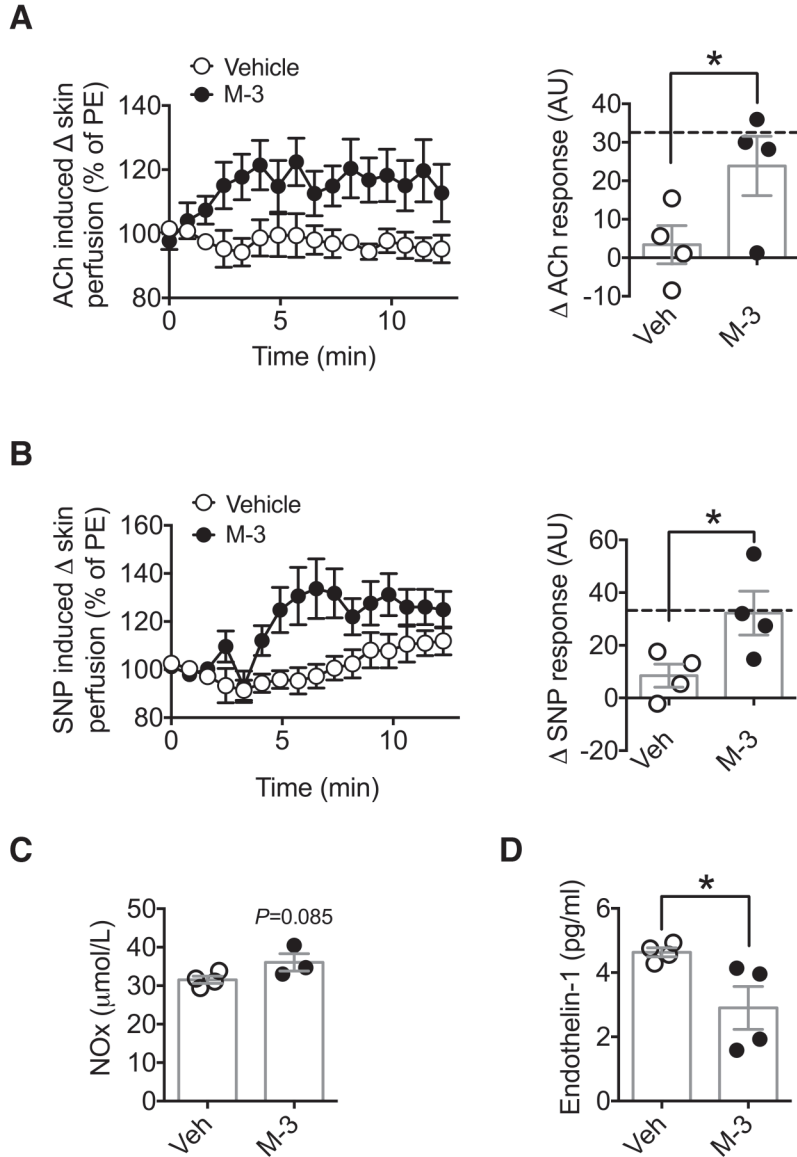

**Supplemental Figure 4. M-3 improves microvascular function in *hAPP23* mice.** (A) Endothelium-dependent microvascular responses induced by ACh in RC-fed *hAPP23* mice ( $n=4$ ) after 4 weeks infusion of vehicle or M-3, with quantitative analysis of ACh response. The broken line denotes the RC-fed *BACE1<sup>KO</sup>* ACh response. (B) Endothelium-independent responses induced by SNP in RC-fed *hAPP23* mice ( $n=4$ ) after 4 weeks infusion of vehicle or M-3, with quantitative analysis of SNP response. The broken line denotes the RC-fed *BACE1<sup>KO</sup>* SNP response. (C) Plasma NO levels in vehicle and M-3 treated *hAPP23* mice ( $n=3-4$ ). (D) Plasma ET-1 levels in vehicle and M-3 treated *hAPP23* mice ( $n=4$ ). Data are means  $\pm$  SEM. \*  $P < 0.05$  by 1-tailed unpaired Student's t-test.

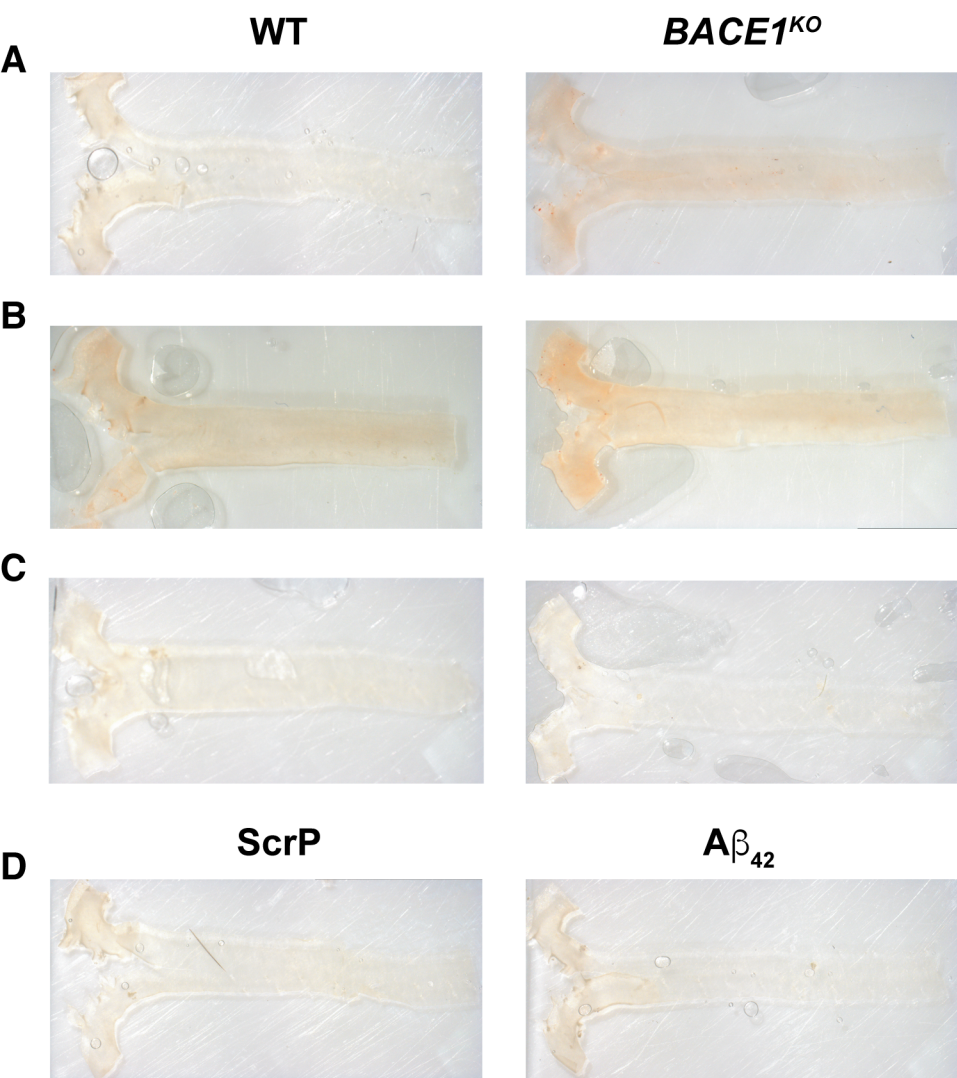

**Supplemental Figure 5. Lack of lipid deposition in aortic arch.**

Representative images of aortic arches stained with Oil Red O. No lipid deposition was detected in aortic arch of WT and *BACE1*<sup>KO</sup> mice on (A) regular chow or after (B) 5 weeks or (C) 12 weeks on high fat diet. (D) Infusion of ScrP or A $\beta$ <sub>42</sub> did not cause lipid deposition.

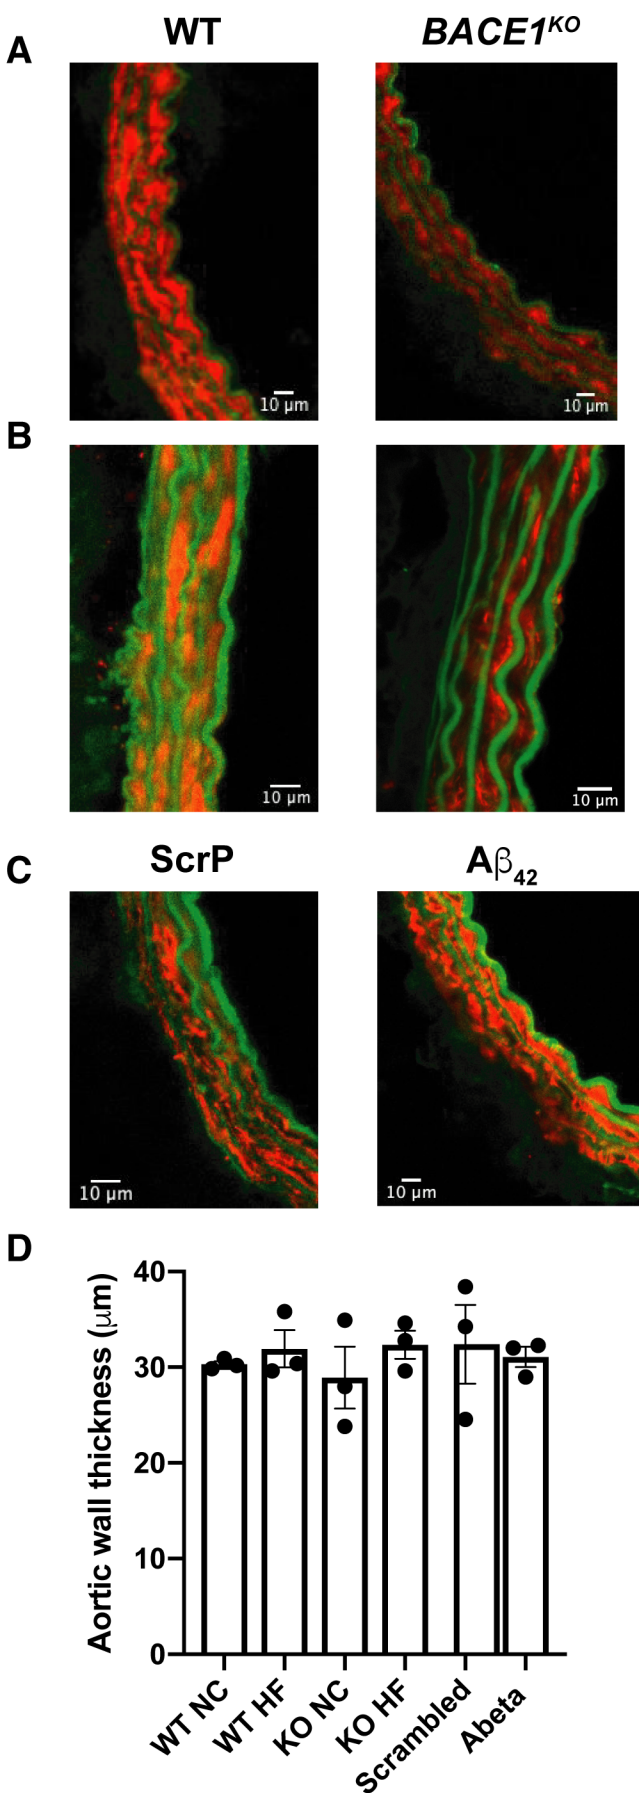

**Supplemental Figure 6. Immunohistochemical analysis of aortic wall structure.**

Representative images of peri-renal sections stained with Isolectin B4 (Green) and  $\alpha$ -smooth muscle actin (Red) from WT and *BACE1*<sup>KO</sup> mice on (A) RC-diet and (B) 12 weeks on high fat diet or (C) following infusion of ScrP or  $A\beta_{42}$ . (D) Aortic wall thickness is unchanged by these treatments, n = 3.

### Supplemental Table 1.

#### Demographic characteristics of participants undergoing CABG surgery.

|                          | <b>Lean</b> | <b>Overweight</b> | <b>Obese</b> |
|--------------------------|-------------|-------------------|--------------|
| N                        | 28          | 80                | 7            |
| Age (years)              | 68.6 (10.8) | 66.3 (9.9)        | 71.3 (7.2)   |
| BMI (kg/m <sup>2</sup> ) | 22.8 (2.0)  | 29.9 (2.3)        | 37.3 (2.6)   |
| Diabetes (%)             | 14.3        | 5.7               | 42.8         |
| Insulin (mIU/L)          | 7.4 (9.7)   | 10.9 (10.8)       | 11.1 (10.1)  |
| Glucose (mg/dL)          | 97 (30.9)   | 109 (36.9)        | 125.7 (39.7) |
| HOMA-IR                  | 1.9 (3.5)   | 2.0 (1.7)         | 3.6 (3.5)    |

Values are expressed as means with SD in brackets.

## Supplemental Table 2.

(A) General composition of regular chow (RC) and high fat (HF) diets and (B) carbohydrate and fat composition of diets for mice.

**A**

| Kcal composition  | <b>RC<br/>(RM1)</b> | <b>HF<br/>(824053)</b> |
|-------------------|---------------------|------------------------|
| Crude fat (%)     | 7.4                 | 45                     |
| Crude Protein (%) | 17.5                | 20                     |
| Carbohydrate (%)  | 75.1                | 35                     |

**B**

| Carbohydrate/Fat composition | <b>RC</b> | <b>HF</b> |
|------------------------------|-----------|-----------|
| Rice starch (% w/w)          | 45        | 28.3      |
| Mixed sugars (% w/w)         | 4.5       | -         |
| Soya oil (% w/w)             | 2.71      | 4.3       |
| Sucrose (% w/w)              | -         | 10.5      |
| Lard (% w/w)                 | -         | 17.9      |



### Supplemental Table 3.

Source, catalogue number, species and dilution of antibodies used for immunoblots.

| Primary Antibody             | Species | Dilution                   | Source                      |
|------------------------------|---------|----------------------------|-----------------------------|
| Bace1                        | Rabbit  | 1:500 (IF)<br>1:3000 (IHC) | Genetex<br>(GTX113319)      |
| CD31                         | Mouse   | 1:25 (IHC)                 | Abcam<br>(ab9498)           |
| Smooth muscle actin<br>(SMA) | Mouse   | 1:1000 (IHC)               | Abcam<br>(ab7817)           |
| Smooth muscle actin<br>(SMA) | Rabbit  | 1:100 (IHC)                | Abcam<br>(ab5694)           |
| peNOS<br>(Ser1177)           | Mouse   | 1:1000 (IB)                | BD Transduction<br>(612392) |
| eNOS                         | Rabbit  | 1:1000 (IB)                | Cell Signalling<br>(32027)  |
| pPKB<br>(Ser473)             | Rabbit  | 1:1000 (IB)                | Cell Signalling<br>(9271)   |
| PKB                          | Rabbit  | 1:1000 (IB)                | Cell Signalling<br>(4691)   |
| pAMPK<br>(Thr172)            | Rabbit  | 1:1000 (IB)                | Cell Signalling<br>(2535)   |
| AMPK                         | Rabbit  | 1:1000 (IB)                | Cell Signalling<br>(5832)   |
| PKG                          | Rabbit  | 1:1000 (IB)                | Cell Signalling<br>(3248)   |
| pVASP<br>(Ser239)            | Rabbit  | 1:1000 (IB)                | Cell Signalling<br>(3114)   |
| ICAM1                        | Mouse   | 1:1000 (IB)                | R&D Systems<br>(AF796)      |
| Actin                        | Rabbit  | 1:5000 (IB)                | Sigma Aldrich<br>(A2066)    |
